# Supplementary material
Source: PubMed Central journal article supplement (PMC9309029)
Supplement: NIHMS1820063-supplement-pmbac762csupp1_pdf.pdf [file NIHMS1820063-supplement-pmbac762csupp1_pdf.pdf]

# Supplementary materials

## 1. Robustness to source image quality

Here we present the robustness test results to the quality degradations of source images, for the 5- and 9-spoke under-sampling scenarios of real-time imaging. We first present the DICE coefficients and center-of-mass errors (COMEs) of the cardiac dataset in Fig. S-1. The quality of the prior images was degraded by removing 20%, 50%, and 80% of radial spokes from the fully-sampled k-space readout trajectory. For comparison, we also present the metrics between the fully-sampled source and target images. The results of KS-RegNet using fully-sampled source images are also included for comparison.

While there is a downward trend of registration accuracy for most of the subjects as the degradation factor increases, no significant reduction of registration accuracy is observed.

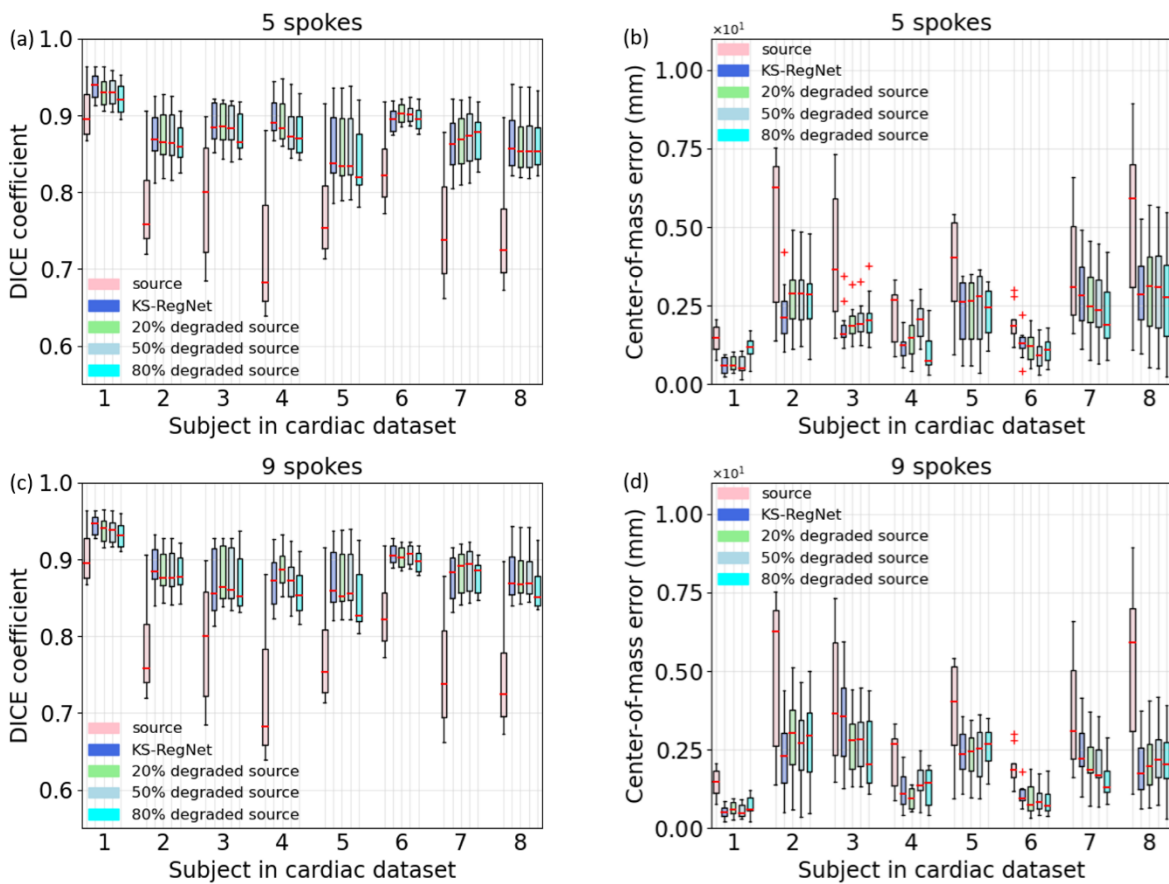

**Figure S-1.** Robustness test results of KS-RegNet to the quality variations of source images on the cardiac dataset. The spoke numbers are given in the subfigure title. The quality of source images was controlled by under-sampling their k-space data by 20%, 50% and 80%, respectively. For comparison, the first and second boxplots of each subject show the metrics between the source and target images, and the results of KS-RegNet using fully-sampled, non-degraded prior images, respectively.

Figure S-2 presents the robustness test results on the abdominal dataset. The results show a similar trend as the cardiac dataset. From Figs. S-1 and S-2, we see that the performance of KS-RegNet is insensitive to the

source image quality degradations in both cardiac and abdominal studies, which demonstrates the robustness of KS-RegNet to image quality variations of the source/prior images.

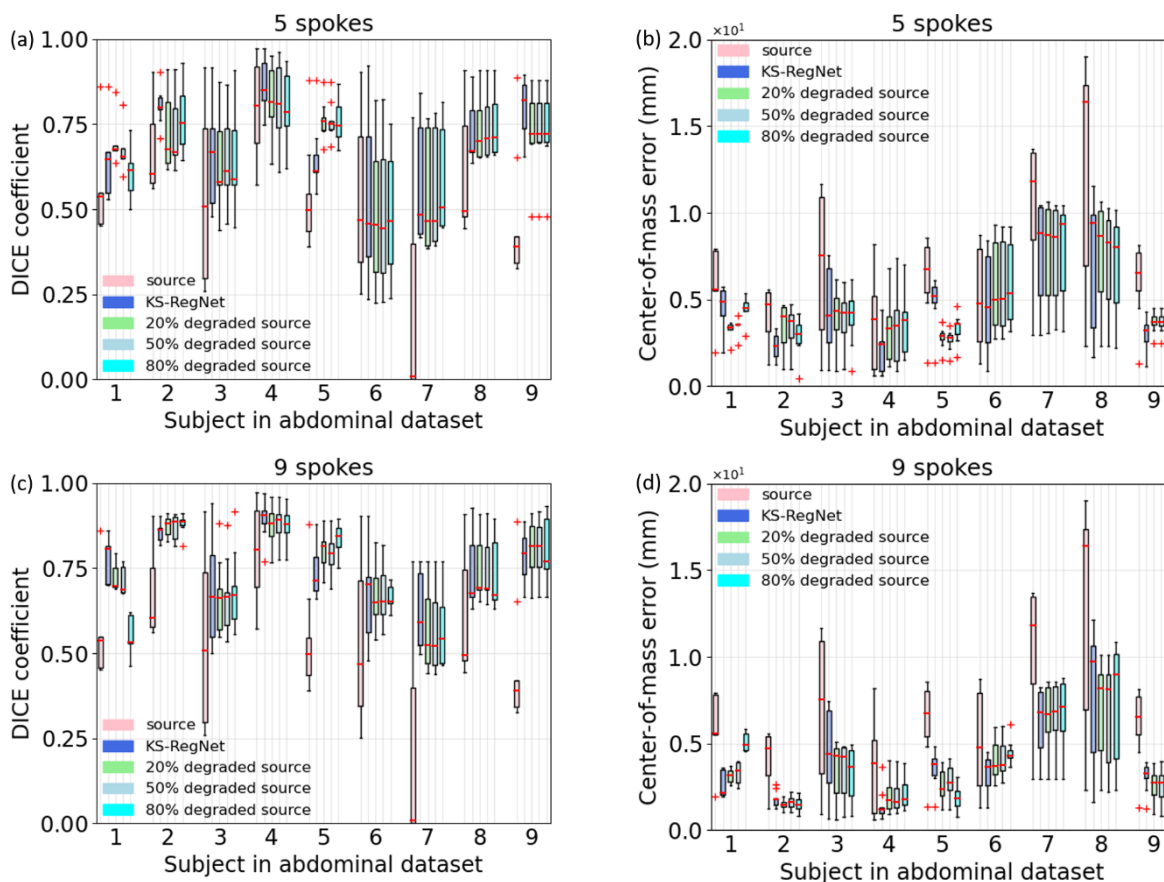

**Figure S-2.** Robustness test results of KS-RegNet to the quality variations of source images on the abdominal dataset. The spoke numbers are given in the subfigure title. The quality of source images was controlled by under-sampling their k-space data by 20%, 50% and 80%, respectively. For comparison, the first and second boxplots of each subject show the metrics between the source and target images, and the results of KS-RegNet using fully-sampled, non-degraded prior images, respectively.

Tables S-1 and S-2 summarize the mean ( $\pm$ s.d.) DICE coefficient and COME of the robustness tests on the cardiac and abdominal datasets, respectively. We also performed Wilcoxon signed-rank tests between the results of KS-RegNet with and without degraded source images. The p-values of the tests are also presented in the Tables. Although some tests appear statistically significant, the actual metric differences are very limited.

**Table S-1.** Mean ( $\pm$ s.d.) DICE coefficients, COME, and Wilcoxon signed-rank test results on the cardiac dataset. The Wilcoxon sign-rank tests are between the results of KS-RegNet with and without degraded source images.

| Number of spokes | Degradation factor | Mean ( $\pm$ s.d.) |                 | p-value          |       |
|------------------|--------------------|--------------------|-----------------|------------------|-------|
|                  |                    | DICE coefficient   | COME (mm)       | DICE coefficient | COME  |
| 5                | 20%                | 0.884 $\pm$ 0.041  | 1.39 $\pm$ 1.18 | 0.291            | 0.060 |
|                  | 50%                | 0.883 $\pm$ 0.040  | 1.41 $\pm$ 1.19 | 0.001            | 0.028 |
|                  | 80%                | 0.876 $\pm$ 0.038  | 1.40 $\pm$ 1.09 | $< 10^{-4}$      | 0.007 |
| 9                | 20%                | 0.891 $\pm$ 0.035  | 1.38 $\pm$ 1.09 | 0.814            | 0.374 |
|                  | 50%                | 0.889 $\pm$ 0.036  | 1.40 $\pm$ 1.09 | 0.237            | 0.472 |
|                  | 80%                | 0.879 $\pm$ 0.037  | 1.40 $\pm$ 1.10 | $< 10^{-4}$      | 0.049 |
| 13               | 20%                | 0.897 $\pm$ 0.033  | 1.13 $\pm$ 0.91 | 0.031            | 0.257 |
|                  | 50%                | 0.896 $\pm$ 0.033  | 1.16 $\pm$ 0.89 | 0.549            | 0.526 |
|                  | 80%                | 0.884 $\pm$ 0.034  | 1.22 $\pm$ 0.90 | $< 10^{-4}$      | 0.001 |

**Table S-2.** Mean ( $\pm$ s.d.) DICE coefficients, COME, and Wilcoxon signed-rank test results on the abdominal dataset. The Wilcoxon sign-rank tests are between the results of KS-RegNet with and without degraded source images.

| Number of spokes | Degradation factor | Mean ( $\pm$ s.d.) |                 | p-value          |       |
|------------------|--------------------|--------------------|-----------------|------------------|-------|
|                  |                    | DICE coefficient   | COME (mm)       | DICE coefficient | COME  |
| 5                | 20%                | 0.679 $\pm$ 0.162  | 4.69 $\pm$ 2.62 | 0.017            | 0.289 |
|                  | 50%                | 0.681 $\pm$ 0.160  | 4.63 $\pm$ 2.58 | 0.045            | 0.502 |
|                  | 80%                | 0.682 $\pm$ 0.154  | 4.75 $\pm$ 2.46 | 0.151            | 0.224 |
| 9                | 20%                | 0.747 $\pm$ 0.127  | 3.66 $\pm$ 2.36 | 0.702            | 0.104 |
|                  | 50%                | 0.745 $\pm$ 0.128  | 3.69 $\pm$ 2.35 | 0.721            | 0.177 |
|                  | 80%                | 0.741 $\pm$ 0.138  | 3.82 $\pm$ 2.58 | 0.836            | 0.456 |
| 13               | 20%                | 0.754 $\pm$ 0.123  | 3.41 $\pm$ 2.18 | 0.107            | 0.084 |
|                  | 50%                | 0.757 $\pm$ 0.119  | 3.40 $\pm$ 2.18 | 0.027            | 0.107 |
|                  | 80%                | 0.748 $\pm$ 0.110  | 3.58 $\pm$ 2.13 | 0.052            | 0.026 |

## 2. Data augmentation using the synthesized phase maps

Since the real-valued MR images in the abdominal dataset were augmented by synthesized phase maps to create complex-valued images, the network performance can depend on the degree of the phase-map augmentation. Here we compared the liver tumor registration accuracy for KS-RegNet trained with different degrees of phase map augmentation. Three scenarios of augmentation were considered: without the phase-map augmentation, with 20 phase maps, and with 40 phase maps. Figure S-3 presents the DICE coefficients and COMEs of KS-RegNet with various numbers of synthesized phase maps at three different under-sampling factors, and Table S-3 summarizes the mean ( $\pm$ s.d.) and p-values of the Wilcoxon signed-rank test between different degrees of augmentation.

The results show that the registration accuracy improves with more phase maps in the data augmentation, and except for the 13-spoke case, the p-values between the cases of the 20 and 40 phase maps are smaller

than 0.05. Furthermore, the 5-spoke trajectory is most benefited from the increase of the phase maps, which may indicate the importance of phase augmentation for severely under-sampled cases.

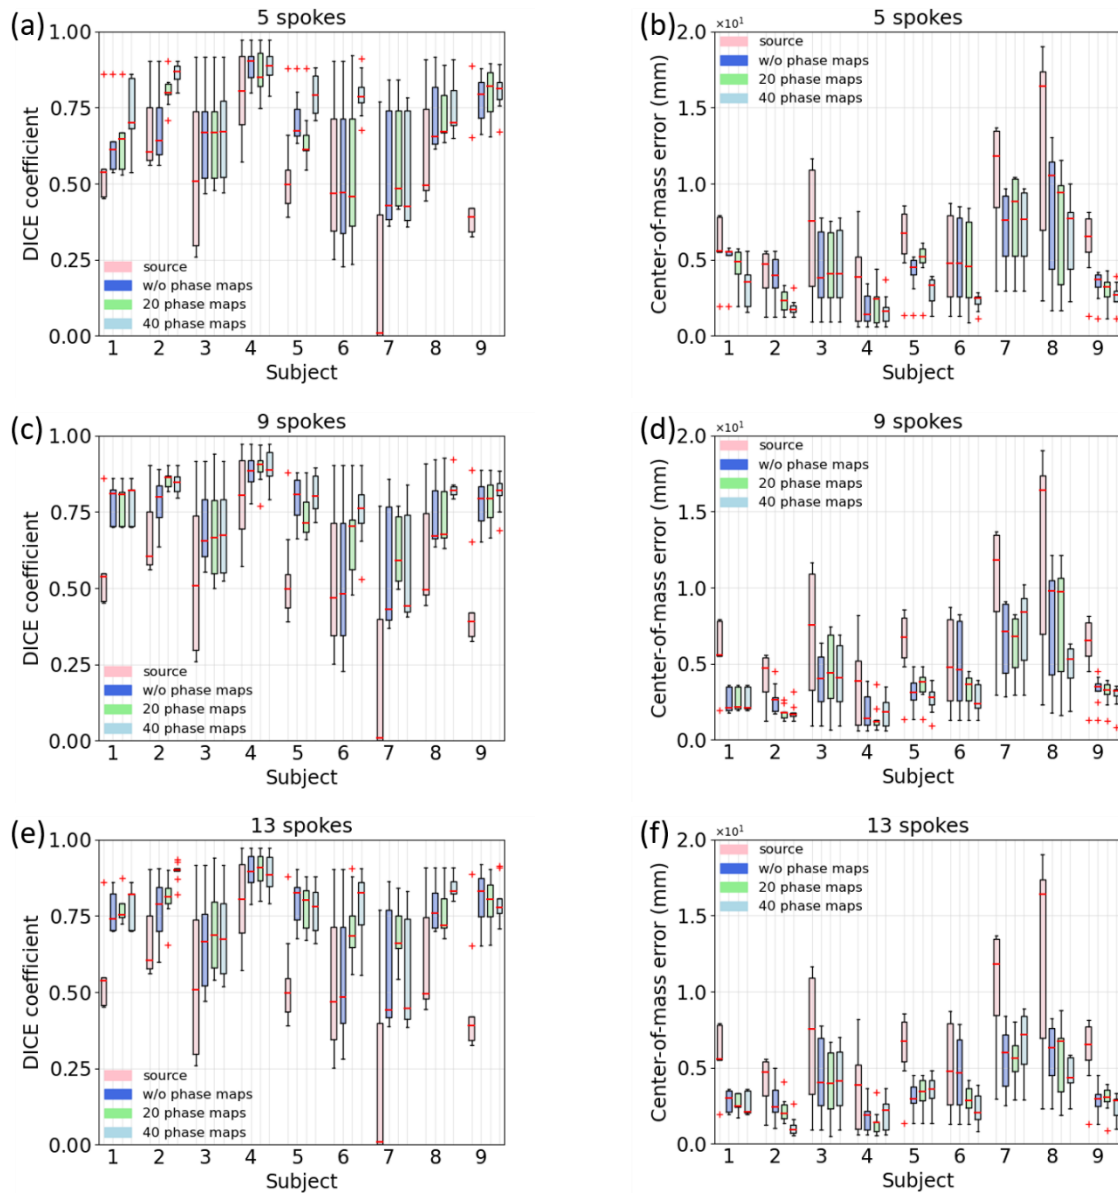

**Figure S-3.** Comparison of liver tumor registration accuracy with various numbers of synthesized phase maps used in the data augmentation, at three under-sampling factors. The spoke numbers are given in the subfigure titles.

**Table S-3.** Mean ( $\pm$ s.d.) DICE coefficients and COMEs of different levels of phase-map augmentation, and p-values of the Wilcoxon signed-rank test between the three levels of augmentation.

| Number of spokes | Metric    | w/o phase maps    | 20 phase maps     | 40 phase maps     | p-value (0-20) | p-value (0-40)     | p-value (20-40)    |
|------------------|-----------|-------------------|-------------------|-------------------|----------------|--------------------|--------------------|
| 5                | DICE      | 0.683 $\pm$ 0.175 | 0.694 $\pm$ 0.167 | 0.755 $\pm$ 0.146 | 0.024          | < 10 <sup>-3</sup> | < 10 <sup>-3</sup> |
|                  | COME (mm) | 4.79 $\pm$ 2.97   | 4.61 $\pm$ 2.91   | 3.72 $\pm$ 2.56   | 0.068          | < 10 <sup>-3</sup> | < 10 <sup>-3</sup> |
| 9                | DICE      | 0.719 $\pm$ 0.171 | 0.751 $\pm$ 0.128 | 0.771 $\pm$ 0.137 | 0.051          | < 10 <sup>-3</sup> | 0.030              |
|                  | COME (mm) | 4.22 $\pm$ 2.80   | 3.91 $\pm$ 2.72   | 3.43 $\pm$ 2.17   | 0.038          | 0.001              | 0.008              |
| 13               | DICE      | 0.727 $\pm$ 0.168 | 0.766 $\pm$ 0.106 | 0.776 $\pm$ 0.142 | 0.007          | 0.006              | 0.489              |
|                  | COME (mm) | 3.83 $\pm$ 2.20   | 3.48 $\pm$ 2.00   | 3.28 $\pm$ 2.04   | 0.005          | 0.034              | 0.271              |

### 3. RegNet with fully-sampled source images

Here we compare the registration accuracy of RegNet with and without accessing fully-sampled source images. The ablation study of KS-RegNet shows that, when the input channels contain the fully-sampled source images, the registration accuracy improves and the model are more robust. However, it is unclear whether the accessibility of fully-sampled source image benefits RegNet. The RegNet variant with accessing to the fully-sampled prior is called RegNet-fp. Figure S-4 compares the registration accuracy of RegNet and RegNet-fp for the subjects in the cardiac dataset. Table S-4 summarizes the mean ( $\pm$ s.d.) DICE coefficients and COMEs and the p-values of the Wilcoxon signed-rank test between the two networks.

The 13-spoke case shows a minute improvement of the registration accuracy with p-values < 0.05 when the network is able to access the fully-sampled source image. On the other hand, for the 5- and 9-spoke cases, one can see the registration accuracy even slightly decreases for RegNet-fp. Since the prior information is not utilized to define the similarity loss during the network training, it seems that RegNet-fp is unable to fully utilize this prior information to improve the registration accuracy. Moreover, as the image quality between the fully- and under-sampled source images diverts apart, this additional input channel of high-quality source image seems potentially confusing the registration network when the sampling ratio is very low (5- and 9- spokes).

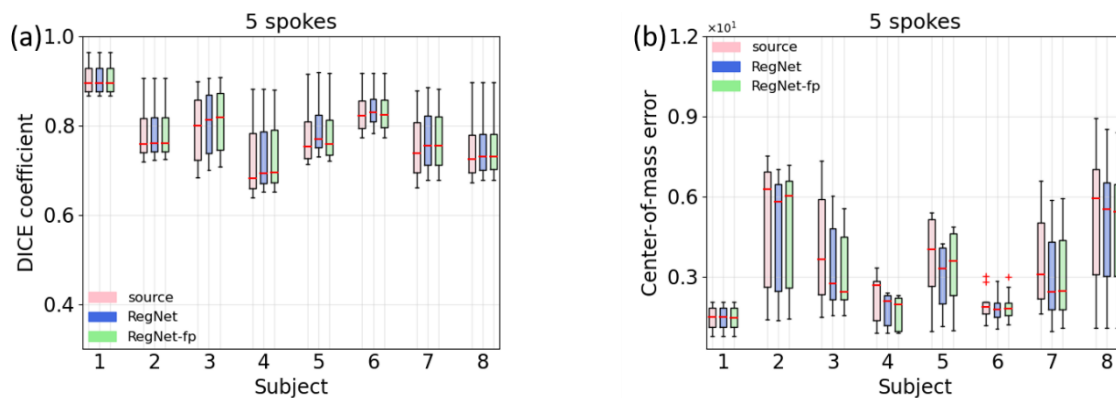

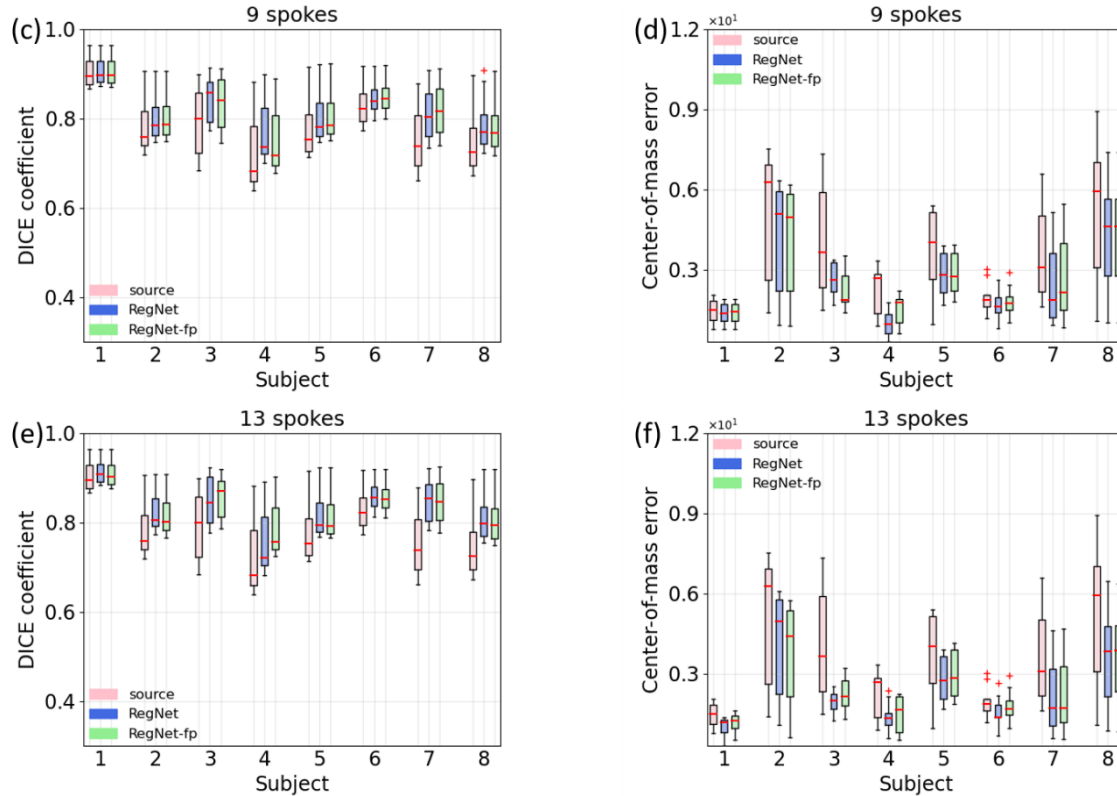

**Figure S-4.** Comparison of the registration accuracy of RegNet and RegNet-fp for the cardiac dataset. RegNet-fp stands for the RegNet with fully-sampled prior images as additional network inputs.

**Table S-4.** Mean ( $\pm$ s.d.) DICE coefficients and COMEs of RegNet and RegNet-fp for the subjects in the cardiac dataset, and p-values of the Wilcoxon signed-rank test between the two variant of RegNet.

| Number of spokes | Metric    | RegNet            | RegNet-fp         | p-value |
|------------------|-----------|-------------------|-------------------|---------|
| 5                | DICE      | 0.797 $\pm$ 0.051 | 0.796 $\pm$ 0.014 | 0.822   |
|                  | COME (mm) | 1.82 $\pm$ 1.85   | 1.83 $\pm$ 1.86   | 0.426   |
| 9                | DICE      | 0.821 $\pm$ 0.040 | 0.819 $\pm$ 0.013 | 0.886   |
|                  | COME (mm) | 1.61 $\pm$ 1.56   | 1.62 $\pm$ 1.54   | 0.341   |
| 13               | DICE      | 0.835 $\pm$ 0.042 | 0.836 $\pm$ 0.033 | 0.001   |
|                  | COME (mm) | 1.49 $\pm$ 1.41   | 1.52 $\pm$ 1.392  | 0.032   |

Figure S-5 presents the liver tumor registration accuracy of RegNet and RegNet-fp, and the mean ( $\pm$ s.d.) DICE coefficients and COMEs are summarized in Table S-5. Like the cardiac dataset, RegNet-fp has better registration accuracy for the 13-spoke case, but the registration error increases when the under-sampling factor increases for some cases (5- and 9- spokes).

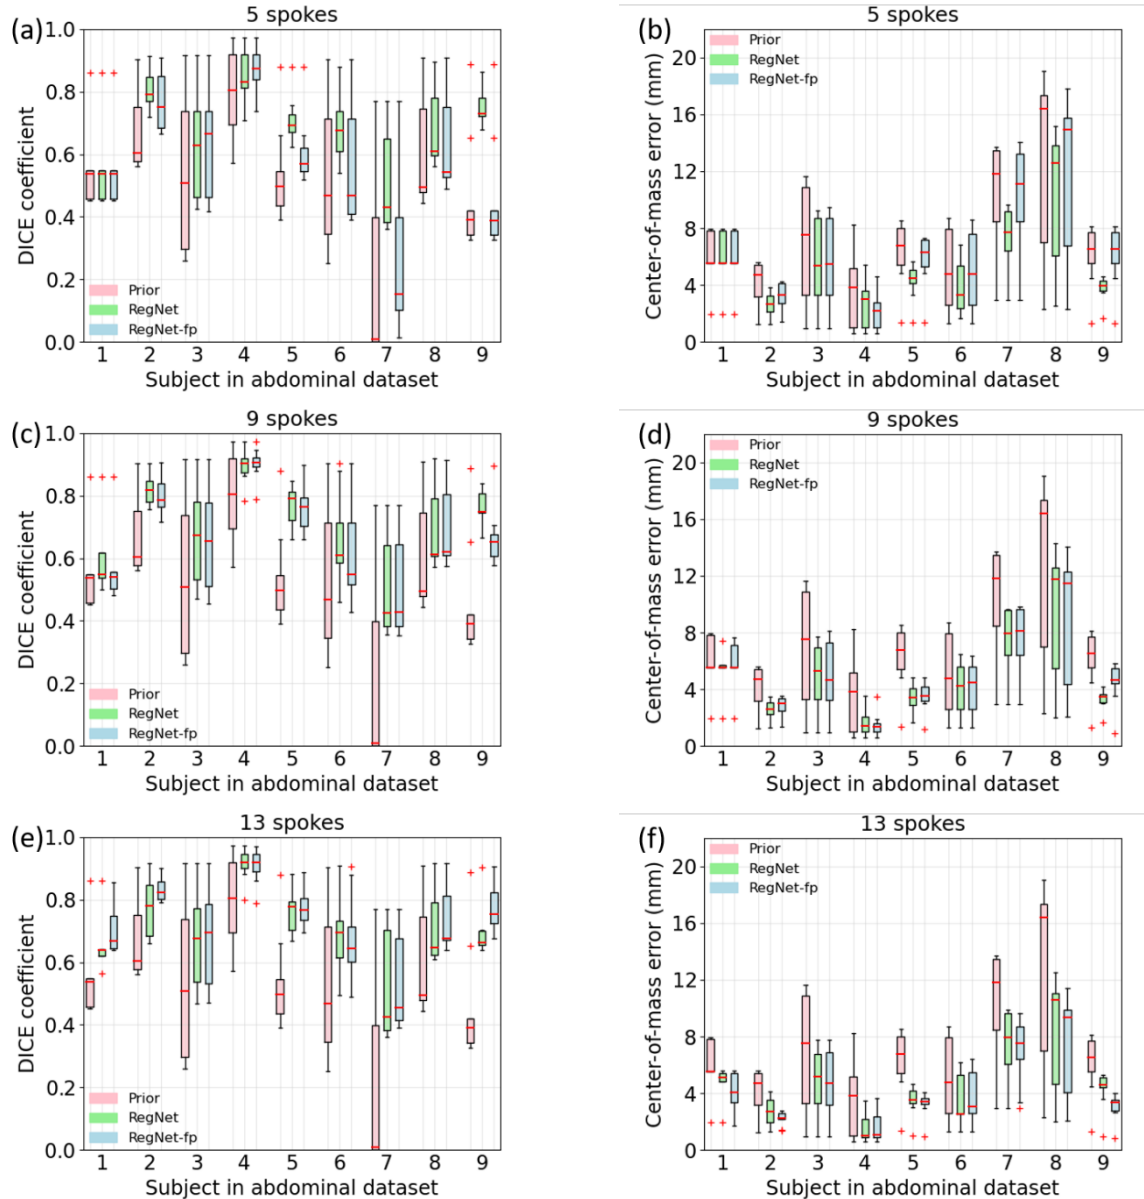

**Figure S-5.** Comparison of the registration accuracy of RegNet and RegNet-fp for the abdominal dataset.

**Table S-5.** Mean ( $\pm$ s.d.) DICE coefficients and COMEs of RegNet and RegNet-fp for the subjects in the abdominal dataset, and p-values of the Wilcoxon signed-rank test between the two variant of RegNet.

| Number of spokes | Metric    | RegNet            | RegNet-fp         | p-value     |
|------------------|-----------|-------------------|-------------------|-------------|
| 5                | DICE      | 0.693 $\pm$ 0.151 | 0.594 $\pm$ 0.228 | $< 10^{-3}$ |
|                  | COME (mm) | 5.14 $\pm$ 3.35   | 6.30 $\pm$ 4.22   | $< 10^{-3}$ |
| 9                | DICE      | 0.713 $\pm$ 0.156 | 0.692 $\pm$ 0.163 | $< 10^{-3}$ |
|                  | COME (mm) | 4.62 $\pm$ 3.23   | 4.78 $\pm$ 3.19   | 0.058       |
| 13               | DICE      | 0.712 $\pm$ 0.149 | 0.735 $\pm$ 0.145 | $< 10^{-3}$ |
|                  | COME (mm) | 4.54 $\pm$ 2.93   | 4.17 $\pm$ 2.72   | $< 10^{-3}$ |
